# Supplementary material for: HIV Pretreatment Drug Resistance Trends in Mexico City, 2017–2020
Source: MDPI journal article supplement (doi:10.3390/pathogens10121587), 2021-12-08
Supplement: s1 [file s1]

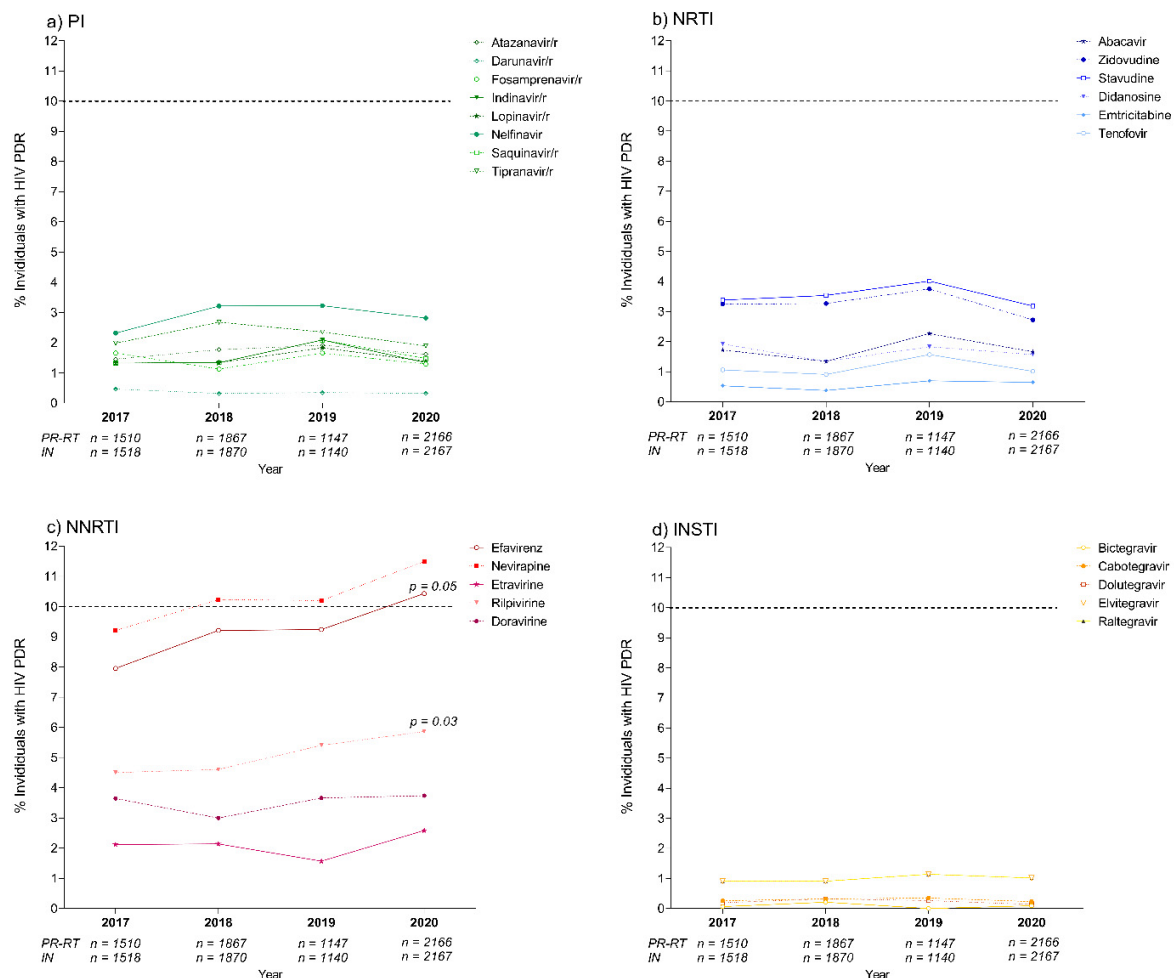

**Figure S1.** Pretreatment drug resistance trends in Mexico City by antiretroviral drug, 2017–2020. Antiretroviral drugs are grouped by drug class: **(a)** PI, **(b)** NRTI, **(c)** NNRTI, and **(d)** INSTI. HIV drug resistance was estimated from PR, RT and IN sequences using the Stanford HIVdb tool (v9.0). Trends were tested using linear regression. PDR, pretreatment drug resistance; PI, protease inhibitors; NRTI, nucleoside analogue reverse transcriptase inhibitors; NNRTI, non-nucleoside analogue reverse transcriptase inhibitors; INSTI, integrase strand transfer inhibitors.

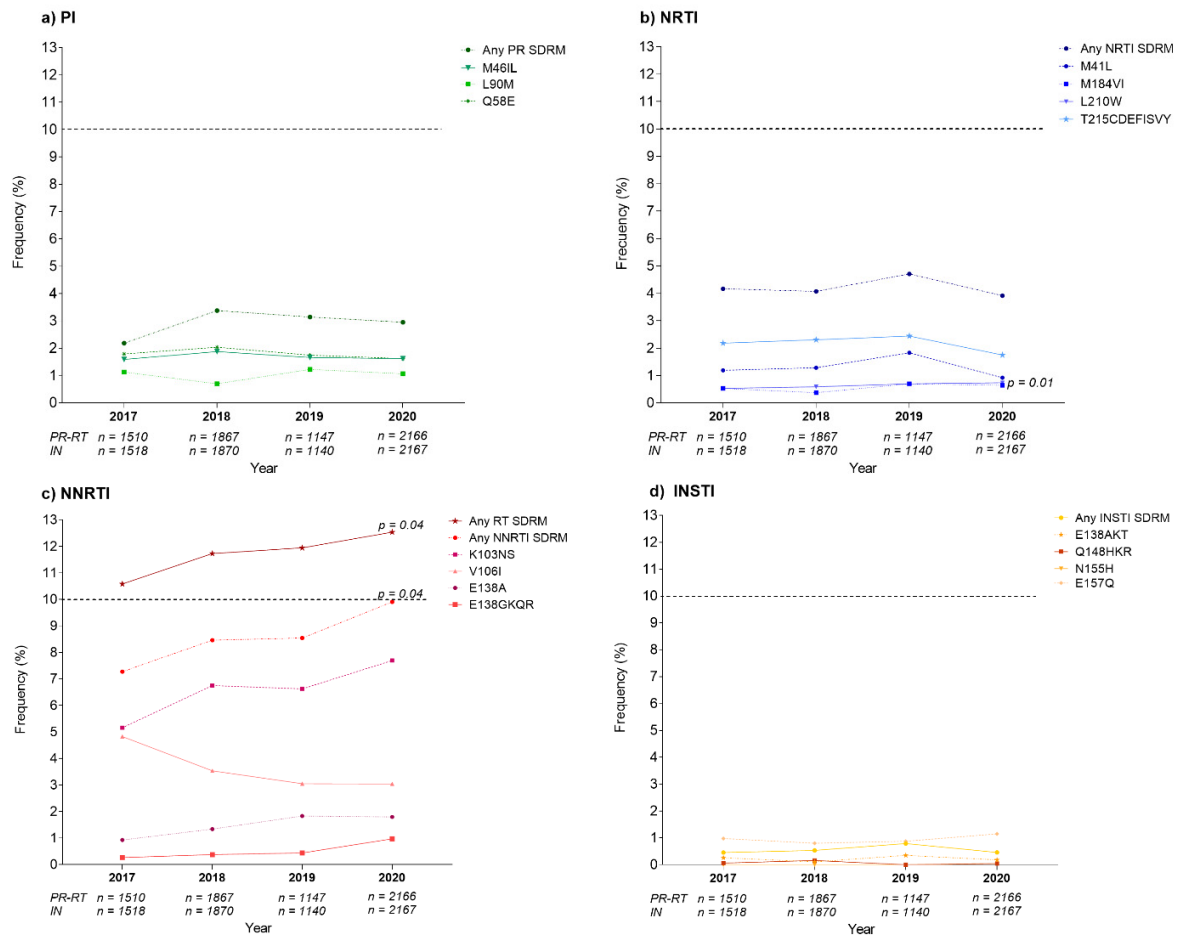

**Figure S2.** Pretreatment antiretroviral drug resistance mutation frequency trends in Mexico City, 2017–2020. Mutations are classified by drug class: (a) PI, (b) NRTI, (c). NNRTI, and (d) INSTI. Trends were tested using linear regression. Selected DRMs including both SDRM and non-SDRM are shown. PI, protease inhibitors; NRTI, nucleoside analogue reverse transcriptase inhibitors; NNRTI, non-nucleoside analogue reverse transcriptase inhibitors; INSTI, integrase strand transfer inhibitors; DRM, drug resistance mutation; SDRM, surveillance DRM.

**Table S1.** Demographic, clinical and behavioral characteristics of antiretroviral treatment restarters <sup>a</sup>.

|                                                                  | ARV Naïve <sup>b</sup><br>( <i>n</i> = 1145) | Prior ARV<br>Exposure <sup>b</sup><br>( <i>n</i> = 141) | <i>p</i> Value |
|------------------------------------------------------------------|----------------------------------------------|---------------------------------------------------------|----------------|
| Gender, <i>n</i> (%)                                             |                                              |                                                         |                |
| Cisgender Women                                                  | 64 (5.6)                                     | 18 (12.8)                                               | <0.001 *       |
| Cisgender Men                                                    | 1060 (92.6)                                  | 115 (81.6)                                              |                |
| Transgender Women                                                | 21 (1.8)                                     | 7 (5.0)                                                 |                |
| Transgender Men                                                  | 0 (0.0)                                      | 1 (0.7)                                                 |                |
| Age (years), <i>n</i>                                            |                                              |                                                         |                |
| Median (IQR)                                                     | 29 (25–35)                                   | 35 (29–41)                                              | <0.001 *       |
| Viral load (log RNA copies/mL), <i>n</i>                         |                                              |                                                         |                |
| Median (range)                                                   | 4.7 (4.1–5.2)                                | 4.4 (3.8–4.9)                                           | 0.0013 *       |
| CD4+ T cell count category, <i>n</i> (%)                         |                                              |                                                         |                |
| <200 cells/mm <sup>3</sup>                                       | 642 (56.1)                                   | 81 (57.5)                                               | 0.905          |
| 200–500 cells/mm <sup>3</sup>                                    | 449 (39.3)                                   | 53 (37.6)                                               |                |
| >500 cells/mm <sup>3</sup>                                       | 53 (4.6)                                     | 7 (5.0)                                                 |                |
| Sexual risk category, <i>n</i> (%)                               |                                              |                                                         |                |
| Heterosexual cis women                                           | 59 (5.2)                                     | 18 (12.8)                                               | 0.001 *        |
| Heterosexual cis men                                             | 147 (12.8)                                   | 23 (16.3)                                               |                |
| Cisgender MSM                                                    | 782 (68.3)                                   | 85 (60.3)                                               |                |
| Transgender women                                                | 25 (2.2)                                     | 6 (4.3)                                                 |                |
| Missing                                                          | 132 (11.5)                                   | 9 (6.9)                                                 |                |
| Marital status, <i>n</i> (%)                                     |                                              |                                                         |                |
| Single                                                           | 828 (72.3)                                   | 104 (73.8)                                              | 0.001 *        |
| Married                                                          | 36 (3.1)                                     | 9 (6.4)                                                 |                |
| Domestic partnership                                             | 150 (13.1)                                   | 21 (14.9)                                               |                |
| Other                                                            | 24 (2.1)                                     | 5 (3.6)                                                 |                |
| Missing                                                          | 107 (9.3)                                    | 2 (1.4)                                                 |                |
| Education, <i>n</i> (%)                                          |                                              |                                                         |                |
| Illiterate                                                       | 5 (0.4)                                      | 2 (1.4)                                                 | <0.001 *       |
| Elementary                                                       | 44 (3.8)                                     | 15 (10.6)                                               |                |
| High School                                                      | 499 (43.6)                                   | 70 (49.6)                                               |                |
| Technician                                                       | 57 (5.0)                                     | 7 (5)                                                   |                |
| Degree                                                           | 388 (33.9)                                   | 42 (29.8)                                               |                |
| Postgraduate                                                     | 40 (3.5)                                     | 3 (2.1)                                                 |                |
| Missing                                                          | 112 (9.8)                                    | 2 (1.4)                                                 |                |
| Self-identified social class, <i>n</i> (%)                       |                                              |                                                         |                |
| Low                                                              | 405 (35.4)                                   | 61 (43.3)                                               | 0.004 *        |
| Middle                                                           | 623 (54.4)                                   | 77 (54.6)                                               |                |
| High                                                             | 2 (0.2)                                      | 0 (0.0)                                                 |                |
| Missing                                                          | 115 (10.0)                                   | 3 (2.1)                                                 |                |
| Other sexually transmitted infections, <i>n</i> (%) <sup>c</sup> |                                              |                                                         |                |
| No                                                               | 554 (48.4)                                   | 67 (47.5)                                               | 0.024 *        |
| Yes                                                              | 361 (31.5)                                   | 58 (41.3)                                               |                |
| Preferred not to answer                                          | 5 (4.4)                                      | 5 (3.5)                                                 |                |
| Missing                                                          | 180 (15.7)                                   | 11 (7.8)                                                |                |
| Role in anal sex, <i>n</i> (%)                                   |                                              |                                                         |                |
| Receptive                                                        | 277 (24.2)                                   | 34 (24.1)                                               | 0.502          |
| Insertive/Receptive                                              | 419 (36.6)                                   | 44 (31.2)                                               |                |
| Insertive                                                        | 195 (17.0)                                   | 25 (17.7)                                               |                |
| Missing                                                          | 254 (22.2)                                   | 38 (27.0)                                               |                |
| Circumcision, <i>n</i> (%)                                       |                                              |                                                         |                |
| No                                                               | 704 (61.5)                                   | 84 (59.6)                                               | 0.766          |
| Yes                                                              | 211 (18.4)                                   | 25 (17.7)                                               |                |
| Missing                                                          | 230 (20.1)                                   | 32 (22.7)                                               |                |
| Injectable drug use, <i>n</i> (%)                                |                                              |                                                         |                |
| No                                                               | 992 (86.6)                                   | 124 (87.9)                                              | 0.001 *        |
| Yes                                                              | 36 (3.1)                                     | 12 (8.5)                                                |                |
| Missing                                                          | 5117(10.2)                                   | 5 (3.6)                                                 |                |
| Drug use for sex, <i>n</i> (%)                                   |                                              |                                                         |                |
| No                                                               | 540 (47.2)                                   | 73 (51.7)                                               | 0.135          |
| Yes                                                              | 439 (38.3)                                   | 56 (39.7)                                               |                |
| Missing                                                          | 166 (14.5)                                   | 12 (8.5)                                                |                |

| Use of Apps for finding sexual partners, <i>n</i> (%) |            |           |         |
|-------------------------------------------------------|------------|-----------|---------|
| No                                                    | 413 (36.1) | 60 (64.6) | 0.042 * |
| Yes                                                   | 490 (42.8) | 45 (31.9) |         |
| Missing                                               | 242 (21.1) | 36 (25.5) |         |

<sup>a</sup> Data collected for a subset of 1348 participants enrolled from June to December 2020. <sup>b</sup> Column percentages are shown. <sup>c</sup> During the previous six months. \*  $p < 0.05$ . ARV, antiretroviral; MSM, men who have sex with men.
